# Supplementary material
Source: PubMed Central journal article supplement (PMC1852848)
Supplement: 7601550s1.pdf [file 7601550s1.pdf]

## Supplementary figures.

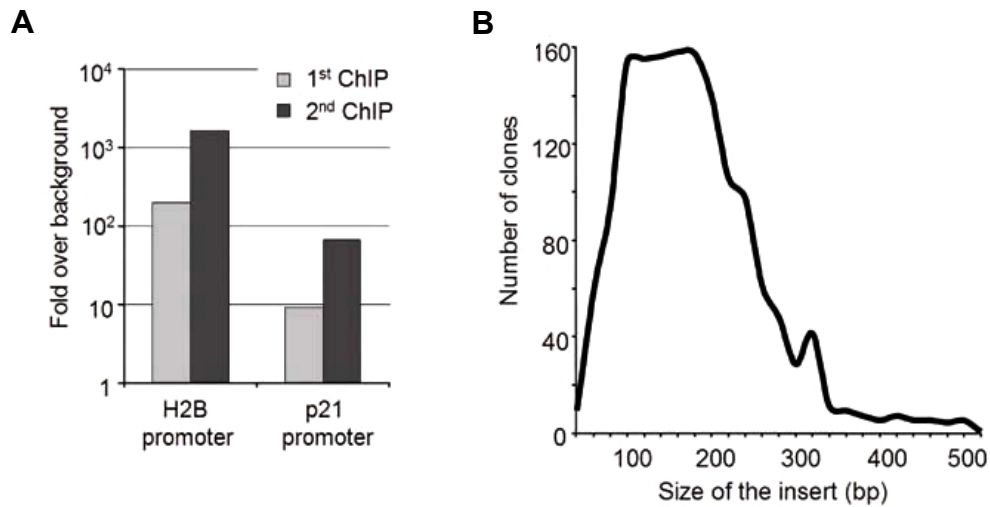

### Supplementary Figure 1.

(A) Sequential chromatin immunoprecipitation (ChIP) was performed with anti-TBP antibody to achieve a high enrichment of TBP binding sites. Enrichment of genomic promoters was measured by qPCR and plotted as fold over background probe (exon 2 of the myoglobin gene).

(B) Size distribution of the cloned DNA fragments. Weighted average length is about 160 bp.

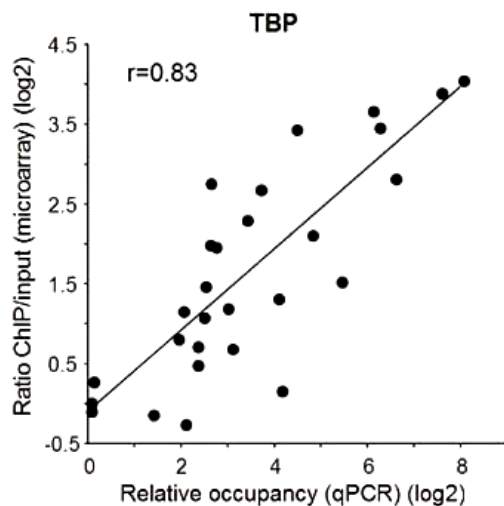

### Supplementary Figure 2. Correlations as visualized by scatter plot.

ChIP/input ratios from microarray and occupancy values from single gene qPCR were obtained for a set of printed control targets and plotted against each other.

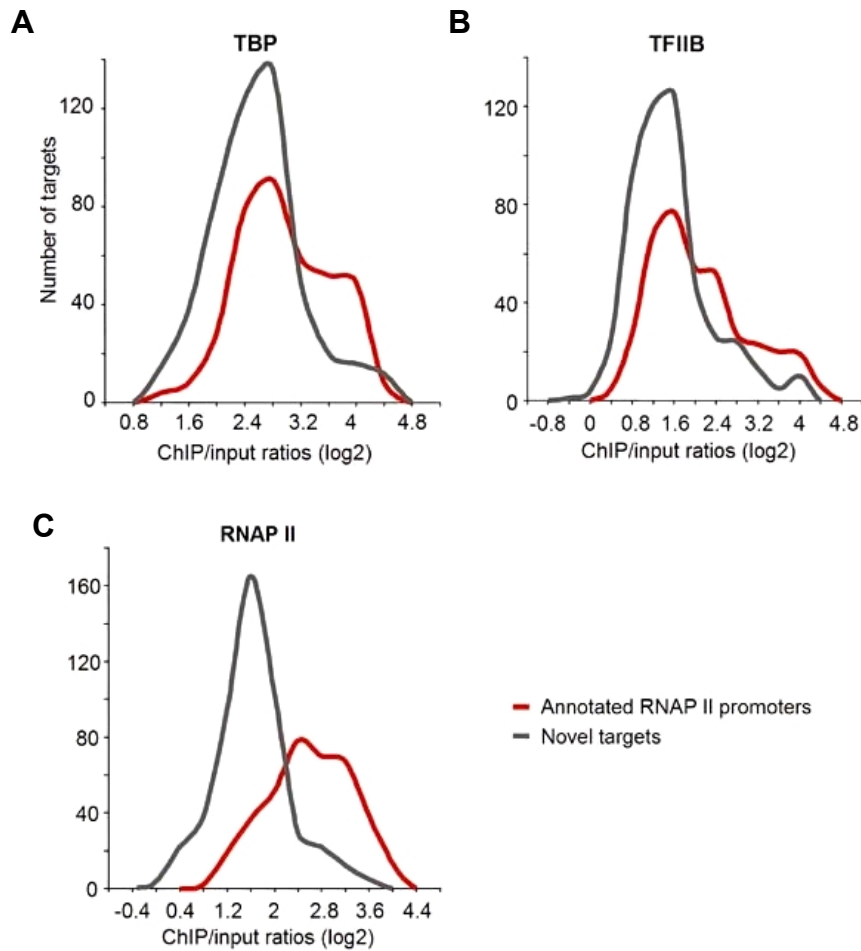

**Supplementary Figure 3.** Transcription factor profiling with TBP binding site microarray. Percentile plots were calculated separately on novel TBP binding sites and annotated RNAP II promoters.

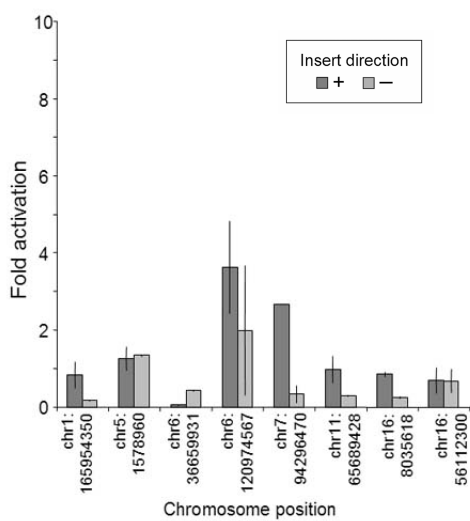

**Supplementary Figure 4.** Gene-reporter assay with randomly selected regions.

Eight genomic DNA fragments of about 1kb from randomly selected regions lacking gene annotation were cloned in 2 orientations in front of gene-reporter in promoter-less vector pGL3-basic. These DNA constructs were transfected in U2OS cells; ratios of transcription activity of the reporter gene over empty vector are shown. The “+” and “-” refers to the direction of the sequence (UCSC genome browser definition) with respect to the reporter gene. Genomic positions of centers of the cloned fragments are indicated.

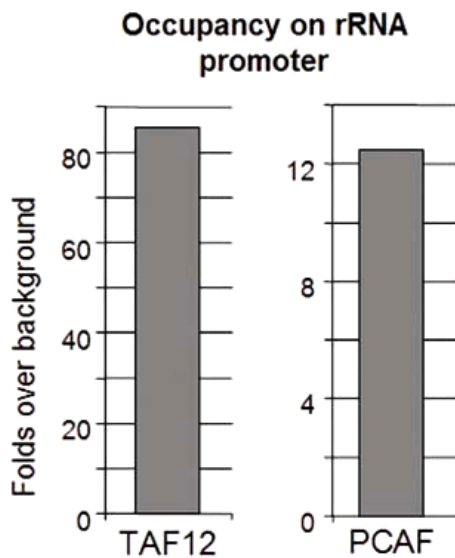

**Supplementary Figure 5.** Occupancy of rRNA promoter with TAF12 and PCAF.

The ChIP occupancy is presented as enrichment recovery over negative control (exon 2 of the myoglobin gene).

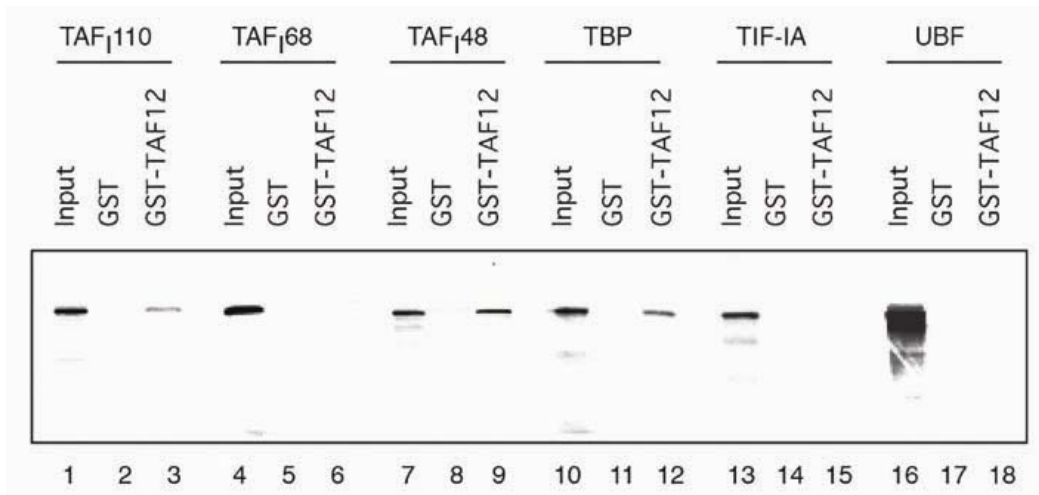

**Supplementary Figure 6.** TAF12 interacts with TBP, TAF<sub>148</sub> and TAF<sub>110</sub>.

The indicated proteins were synthesized by in vitro translation in the presence of <sup>35</sup>S-methionine, captured by GST-TAF12 (lane 3, 6, 9, 12, 15, 18) or GST alone (lane 2, 5, 8, 11, 14, 17), and analyzed by SDS-PAGE and autoradiography. The Input lanes (1, 4, 7, 10, 13, 16) contain 10% of the material used in the pull-down assays.

**Supplementary Table I.** The E2F1 / E2F4 target genes from the TBP binding sites microarray.

| <b>Gene name</b> | <b>Descripton</b>                                            | <b>Biological function</b>            |
|------------------|--------------------------------------------------------------|---------------------------------------|
| CDCA1            | cell division cycle associated 1                             | cell cycle                            |
| DRF1             | Dbf4-related factor 1                                        | cell cycle                            |
| BRCA2            | breast cancer 2                                              | cell cycle, DNA repair, transcription |
| CDKN2D           | cyclin-dependent kinase inhibitor 2D                         | cell cycle                            |
| ADPRTL2          | ADP-ribosyltransferase-like 2                                | transcription, DNA repair             |
| HMG2L1           | high-mobility group protein 2-like 1                         | transcription                         |
| ZNF443           | zinc finger protein 443                                      | transcription                         |
| ZNF143           | zinc finger protein 143                                      | transcription                         |
| ZFP36L2          | zinc finger protein 36, C3H type-like 2                      | transcription                         |
| H2BK, H2AH       | Histone                                                      | chromatin                             |
| H2BJ, H2AG       | Histone                                                      | chromatin                             |
| H4               | Histone                                                      | chromatin                             |
| PRPSAP1          | phosphoribosyl pyrophosphate synthetase-associated protein 1 | nucleotide biosynthesis               |
| RPS16            | ribosomal protein S16                                        | protein biosynthesis                  |
| TK1              | thymidine kinase 1                                           | DNA metabolism                        |
| SLC3A2           | solute carrier family 3                                      | carbohydrate metabolism               |
| LYK5             | breast cancer antigen NY-BR-96.                              | protein kinase                        |
| CCT5             | chaperonin containing TCP1, subunit 5                        | protein folding                       |
| bA33E24.2        |                                                              | Vega predicted gene                   |
| dJ564F22.2       |                                                              | Vega predicted gene                   |
| MGC13170         |                                                              | Predicted protein                     |
| CRAMP1L          |                                                              | Predicted protein                     |

**Supplementary Table II.** Quantitative PCR primers targeting the novel TBP binding sites.

| Name                | Position (hg17)             | Forward primer                | Reverse primer           |
|---------------------|-----------------------------|-------------------------------|--------------------------|
| A2_3_39             | chr6:65450495               | CCACTAGGGTTGGGACCATG          | CGGTTAGGCCTGGGACTTGT     |
| A5_8_39             | chr16:83280487              | AGTCTGATTACAGCTCTGGAGGAA      | CACGCCATAAAACCAGCACA     |
| A9_9_39             | chr16:85520562.5            | GAGGATGGCTAGCAACGAGC          | AATGCAGTCCAGGGATTGG      |
| B10_10_39           | chr14:19137583,<br>18575885 | AGCAGCACACCAGCACTGAA          | AGCACGGTGAGAGCAACCTC     |
| B7_8_46             | chr4:169927436              | AGTGCATAAGAGCATGGAGTG         | AGGAATGCTGCTAAACTCCAGAA  |
| B8_1_46             | chr1:24308606               | TTACCCATGAGGACGACACG          | GGCATGGAACCTGGACGAGT     |
| C10_1_39            | chr7:1326447                | TGCCTCATGCACACTGGAAG          | ACTCACGGCTTTGACACTCGT    |
| C10_10_39           | chr9:33151138.5             | ACTGCCAAAGAATTCAGCAACA        | TGCACAAATGAAGGCCAGG      |
| C4_5_46             | chr8:67597684.5             | CCAAGAGGCACTCCCCTGTA          | TCCCAGCTGCTTCTCAACT      |
| C6_5_39             | chr8:65832131               | ATTGTGGAGACCAGCCAGGT          | AGGCTTGTCAACATCCTCCAA    |
| C8_0_46             | chr14:23634665.5            | CTCCCACCAACACCAAAGCT          | GCTTCCCCTGGCTCTTCTTC     |
| C8_10_39            | chr1:195382748              | GGCTGATTATGCTGGTGTCTATG       | CACACAGGCGCTACCAAATG     |
| D10_6_46            | chr5:34753810               | ACCACATCCTTCCAACCCTG          | AAACATTCTGCTTCCCCTTGAAA  |
| D3_2_46             | chr8:104266344.5            | GACCAGGATGCAGGCTCAAG          | AACGACAGCTCTCTGCGGTT     |
| D5_1_46             | chr4:41261444.5             | AAGGTTTCAGGTGGTTGGGC          | GCAGCCTGTCTGACGGAGA      |
| D5_10_39            | chr17:42638140              | GTCACCAGGCCTTCAACACC          | CCTGCTTCTCTCGGCACAG      |
| D9_7_39             | chr17:73338135.5            | TGGACACACAAGTTAGGGTTCTGA      | TTGGAGGCTGCAGAGACTCA     |
| E1_3_39             | chr16:2013230               | GGATCGAGTGGAAGGAAGCC          | ATCGTGCGAGGAGTTGCC       |
| F11_3_46            | chr7:54974791.5             | CAGAGCAGGTTGGAGTGAGC          | TGGAGTCAGCCACAGAGGTTG    |
| F12_7_39            | chr2:26858648.5             | ACGTCAGCAGGTCCTCACT           | GCCTGTCCCATTGTCCTGG      |
| F5_4_46             | chr14:80755508              | TAAATGGAGAGGCGGTGACG          | GACTCTGCCAGGATGGGAAG     |
| G11_0_46            | chr16:22160131              | AAAAAATTGAGATCACTAAATAAAGCACA | TTACAGAAGAGTGGGTCAATGGG  |
| G2_5_46             | chr17:76629358              | GGCTCTTGTTGTTGGTCCTG          | CACTCTTGCTCCCTGGGCT      |
| G9_5_46             | chr4:49157967               | GCCCGAGGCTATTTAAACCC          | CGCGAAGATCTGAGTACAGGC    |
| H9_1_39             | chr20:55221364.5            | GCTCCCCACCTCAGCTT             | CTGTTCTATGATTTGGCAGGAAAG |
| H9_10_39            | chr17:61966655              | ATGCAGTTGGTGCCTCTCTCT         | GCAACAAACACAACAGCCTCC    |
| GADD45A<br>enhancer | chr1:67864614               | TTCTTTTAGCAGGGCAGATTAGA       | GGGTGAGCCAGGAATTCATTT    |
| H2BR<br>promoter    | chr6:27208560               | TTGCATAAGCGATTCTATATAAAAGCG   | ATAAAGCGCCAACGAAAAGG     |
| myoglobin<br>exon2  | chr22:34331584.5            | AAGTTTGACAAGTTCAAGCACCTG      | TGGCACCATGCTTCTTTAAGTC   |
| p21 promoter        | chr6:36754172               | TGCTGTGTCCTCCTGGAGAGT         | CACGAAGTGAGCCACAAATCTG   |
